# Supplementary material for: Artificial reefs facilitate tropical fish at their range edge
Source: PubMed Central journal article supplement (PMC6502939; doi:10.1038/s42003-019-0398-2), 2019-05-06
Supplement: 42003_2019_398_MOESM1_ESM.pdf [file 42003_2019_398_MOESM1_ESM.pdf]

1 **Supplementary Information**

2

3 **Supplementary Figures**

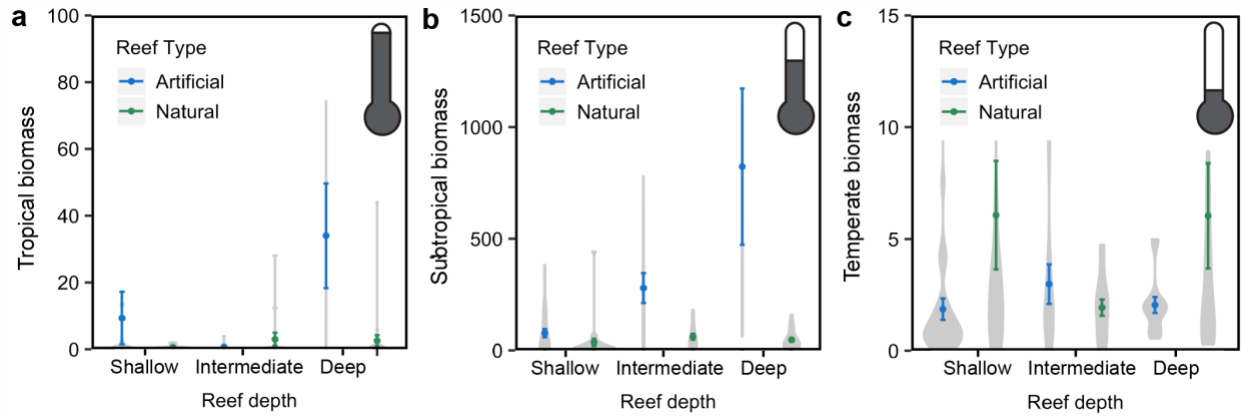

5 **Supplementary Figure 1:** Biomass of fishes (kg per 120 m<sup>2</sup>) on artificial reefs versus natural

6 reefs by fish climate range: a) tropical, b) subtropical, c) temperate. Reef depth zones are:

7 shallow: 5-18 m, intermediate: 18-25 m, deep: 25-35 m. Shaded areas of the violin plots are

8 proportional to the number of observations. Points represent mean observed biomass ( $\pm 1$  SE).

9 GLM results appear in Supplementary Table 3.

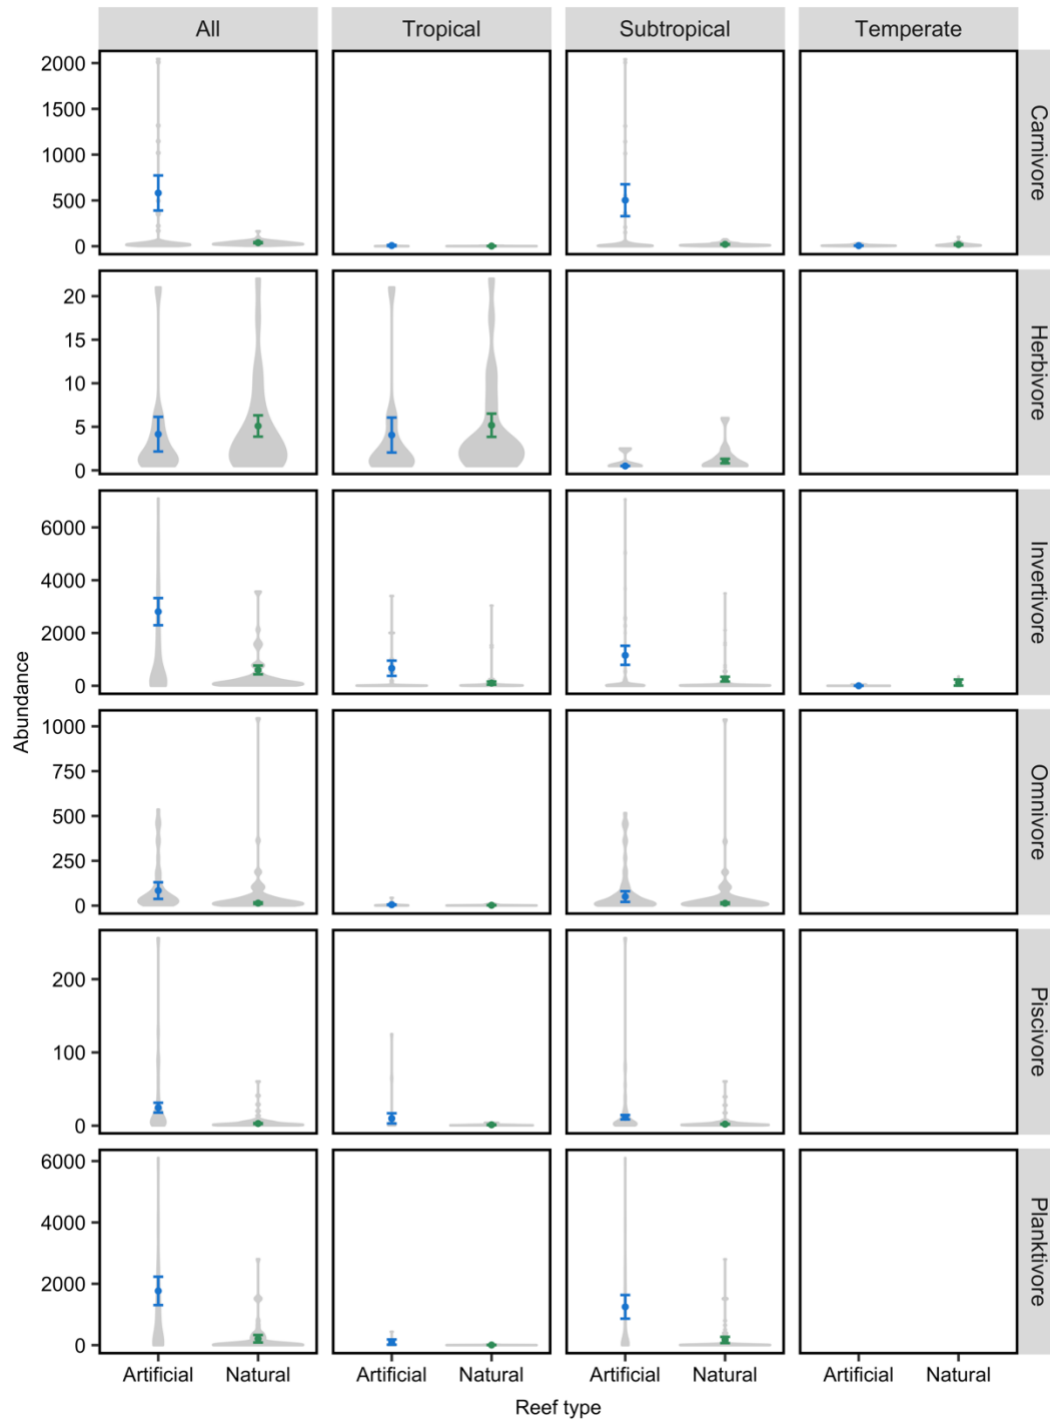

10

11 **Supplementary Figure 2:** Abundance ( $\pm 1$  SE) of fishes (per 120 m<sup>2</sup>) on deep (18-25 m)  
 12 artificial reefs versus natural reefs by fish climate range and fish trophic group. GLM results  
 13 appear in Supplementary Table 4.

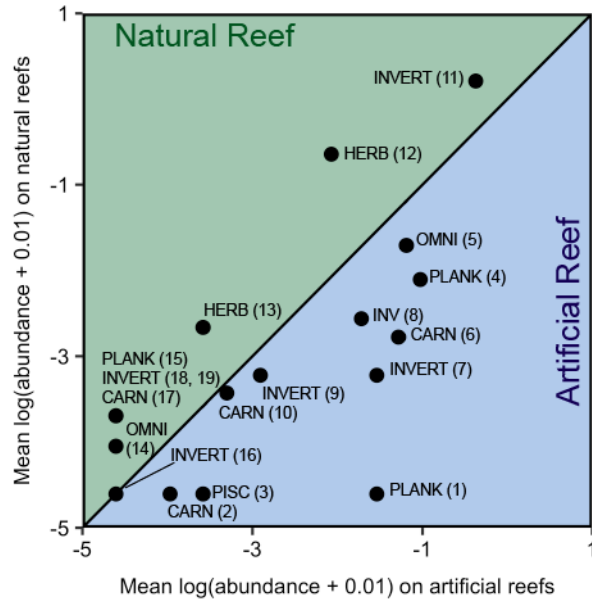

14

15 **Supplementary Figure 3:** Mean abundance (log (abundance + 0.01) (per 120 m<sup>2</sup>)) of tropical  
 16 and subtropical fishes at their range edges. Each fish is indicated by a point. Text labels indicate  
 17 trophic group (PLANK = planktivore, CARN = carnivore, HERB = herbivore, OMNI =  
 18 omnivore, INVERT = invertivores). Fishes falling in the blue region of the graph, below the 1:1  
 19 line, occur in higher numbers on artificial reefs. Fishes in the green region, above the 1:1 line,  
 20 display higher abundance on natural reefs. Metadata for these fishes are displayed in  
 21 Supplementary Table 6, referenced by the number in parentheses.

22

23

24 **Supplementary Tables**

25 **Supplementary Table 1:** Descriptions of thirty reefs surveyed. Coordinates are provided to the  
 26 nearest tenth of a degree for latitude (Lat) and longitude (Lon). Mean environmental variables  
 27 include depth (Dep), reef complexity measured as digital reef rugosity (DRR), water temperature  
 28 (Tem), and sediment standard deviation (Sed; natural reefs only). Date indicates month and year  
 29 (month/year) of replicate transects. Coordinates of a previously unknown wreck are purposely  
 30 excluded.

| <b>Reef name</b>               | <b>Reef type</b> | <b>Structure</b> | <b>Lat (dd)</b> | <b>Lon (dd)</b> | <b>Dep (m)</b> | <b>DRR (m)</b> | <b>Tem (°C)</b> | <b>Date</b>                                             |
|--------------------------------|------------------|------------------|-----------------|-----------------|----------------|----------------|-----------------|---------------------------------------------------------|
| Theodore Parker (AR-315)       | Artificial       | Ship             | 34.7            | -76.7           | 10.2           | 0.5            | 24.3            | 7/8/2013, 10/29/13, 7/29/14, 10/2/14, 10/20/14          |
| Atlantic Beach Bridge (AR-320) | Artificial       | Concrete         | 34.7            | -76.8           | 15.2           | 0.8            | 23.0            | 10/31/2013, 7/29/14, 9/29/14, 10/20/14, 5/19/15         |
| Concrete Pipes, 2007 (AR-342)  | Artificial       | Concrete         | 34.6            | -77.0           | 16.1           | 0.4            | 24.2            | 9/6/2013, 6/3/14, 8/20/14, 10/21/14, 5/19/15            |
| USS Indra (AR-330)             | Artificial       | Ship             | 34.6            | -76.9           | 15.0           | 1.1            | 24.0            | 6/9/2014, 8/21/14, 5/18/15                              |
| Titan (AR-345)                 | Artificial       | Ship             | 34.5            | -77.0           | 16.6           | 0.8            | 23.0            | 7/18/2013, 10/28/13, 6/2/14, 10/2/14, 10/21/14, 5/19/15 |
| Concrete Pipes, 2006 (AR-345)  | Artificial       | Concrete         | 34.5            | -77.0           | 18.7           | 0.2            | 22.9            | 7/18/2013, 10/28/13, 6/2/14, 10/2/14, 10/21/14, 5/19/15 |
| Yard Oiler FS-26 (AR-300)      | Artificial       | Ship             | 34.3            | -76.4           | 26.4           | 1.4            | 24.6            | 6/17/14                                                 |
| Spar (AR-305)                  | Artificial       | Ship             | 34.3            | -76.6           | 28.3           | 1.4            | 25.1            | 8/30/2013, 6/16/14, 10/10/14                            |
| <i>Alexander Ramsey</i>        | Artificial       | Ship             | 34.2            | -77.8           | 12.0           | 2.3            | 24.7            | 9/19/2013, 7/1/14, 9/5/14, 11/13/14                     |
| <i>Cassimir</i>                | Artificial       | Ship             | 34.0            | -77.0           | 32.6           | 0.8            | 25.4            | 9/4/2014, 11/5/14                                       |
| <i>John D. Gill</i>            | Artificial       | Ship             | 33.9            | -77.5           | 25.1           | 0.7            | 25.0            | 9/24/2013, 6/24/14, 8/7/14, 11/13/14                    |
| <i>Raritan</i>                 | Artificial       | Ship             | 33.5            | -77.9           | 21.5           | 1.7            | 23.3            | 9/25/2013, 6/25/14, 9/11/14, 12/18/14                   |
| <i>City of Houston</i>         | Artificial       | Ship             | 33.4            | -77.7           | 28.0           | 0.4            | 27.7            | 9/25/2013, 6/25/14, 9/11/14                             |
| Unknown Wreck                  | Artificial       | Ship             | -----           | -----           | 29.0           | 0.5            | 24.1            | 12/4/2013, 6/25/14, 9/11/14                             |
| Keypost Rock                   | Natural          | Ledge            | 34.6            | -77.0           | 15.0           | 0.4            | 25.0            | 10/24/14                                                |
| Barge Rock                     | Natural          | Ledge            | 34.6            | -76.6           | 16.1           | 0.6            | 24.8            | 8/19/2013, 7/30/14, 7/29/14, 10/20/14                   |

|                           |         |                   |      |       |      |     |      |                                                          |
|---------------------------|---------|-------------------|------|-------|------|-----|------|----------------------------------------------------------|
| Station Rock              | Natural | Pavement & rubble | 34.6 | -77.1 | 15.6 | 0.3 | 23.4 | 9/6/2013, 10/30/13, 6/2/14, 8/20/14, 10/21/14, 5/19/15   |
| Northwest Reef            | Natural | Ledge             | 34.4 | -76.6 | 21.4 | 0.7 | 23.8 | 8/12/2013, 6/17/14, 10/10/14, 10/20/14, 5/18/15          |
| Southwest of Knuckle Buoy | Natural | Pavement & rubble | 34.4 | -76.5 | 14.2 | 0.2 | 23.2 | 8/20/2013, 10/28/13, 10/20/14, 5/18/15                   |
| 10 Fathom                 | Natural | Ledge             | 34.4 | -76.6 | 20.9 | 0.6 | 23.7 | 8/20/2013, 10/29/13, 6/17/14, 8/22/14, 10/20/14, 5/18/15 |
| West Rock                 | Natural | Pavement & rubble | 34.3 | -76.6 | 24.9 | 0.3 | 25.2 | 9/4/2013, 6/16/14, 10/10/14, 5/27/15                     |
| 210 Rock                  | Natural | Pavement & rubble | 34.2 | -76.6 | 30.2 | 0.2 | 25.2 | 9/4/2013, 6/16/14, 10/10/14                              |
| Dallas Rocks              | Natural | Pavement & rubble | 34.2 | -77.6 | 16.5 | 0.3 | 24.7 | 9/20/2013, 7/1/14, 9/4/14, 11/5/14                       |
| 200 / 200 Ledge           | Natural | Ledge             | 34.1 | -77.4 | 25.1 | 0.3 | 23.8 | 9/20/2013, 11/5/14                                       |
| 5 Mile Ledge              | Natural | Ledge             | 34.1 | -77.8 | 15.8 | 0.4 | 24.7 | 9/19/2013, 7/1/14, 9/5/14, 11/13/14                      |
| 23 Mile Ledge             | Natural | Ledge             | 34.0 | -77.4 | 28.7 | 0.4 | 25.5 | 6/24/2014, 9/5/14                                        |
| Hammerhead Ledge          | Natural | Pavement & rubble | 33.5 | -77.9 | 25.4 | 0.1 | 21.8 | 12/13/2013, 6/30/14, 9/11/14, 12/19/14                   |
| Thumb Ledge               | Natural | Pavement & rubble | 33.5 | -77.9 | 26.5 | 0.2 | 26.5 | 9/25/2013, 6/25/14, 9/11/14                              |
| Lightning Bolt Ledge      | Natural | Pavement & rubble | 33.5 | -77.9 | 28.5 | 0.2 | 21.8 | 12/13/2013, 6/25/14, 9/11/14, 12/19/14                   |
| Bumpy Ledge               | Natural | Pavement & rubble | 33.5 | -77.9 | 29.2 | 0.1 | 21.0 | 12/13/2013, 6/25/14, 12/15/14                            |

32 **Supplementary Table 2:** Fish, shark, and turtle species list from 226 fish belt-transects  
 33 conducted on warm-temperate reefs of the NC continental shelf. Abundance values indicate the  
 34 total number of each species observed across the 226 transects on artificial reefs (AR), natural  
 35 reefs (NR), and in total (Total). Bold indicates members of the federally-managed snapper-  
 36 grouper complex.

| Family            | Genus                  | Species                 | Common name              | Climate range      | Functional group     | Habitat zone    | AR         | NR         | Total      |
|-------------------|------------------------|-------------------------|--------------------------|--------------------|----------------------|-----------------|------------|------------|------------|
| Acanthuridae      | <i>Acanthurus</i>      | <i>chirurgus</i>        | Doctorfish               | Subtropical        | Herbivore            | Demersal        | 8          | 23         | 31         |
| Acanthuridae      | <i>Acanthurus</i>      | <i>coeruleus</i>        | Blue tang surgeonfish    | Tropical           | Herbivore            | Demersal        | 1          | 0          | 1          |
| Anguillidae       | <i>Anguilla</i>        | <i>rostrata</i>         | American eel             | Subtropical        | Invertivore          | Demersal        | 0          | 2          | 2          |
| Apogonidae        | <i>Apogon</i>          | <i>pseudomaculatus</i>  | Twospot cardinalfish     | Tropical           | Invertivore          | Demersal        | 10         | 72         | 82         |
| Apogonidae        | <i>Apogon</i>          | <i>planifrons</i>       | Pale cardinalfish        | Tropical           | Invertivore          | Demersal        | 0          | 2          | 2          |
| Atherinopsidae    | <i>Menidia</i>         | <i>menidia</i>          | Silversides              | Temperate          | Planktivore          | Pelagic         | 14255      | 10320      | 24575      |
| <b>Balistidae</b> | <b><i>Balistes</i></b> | <b><i>capricus</i></b>  | <b>Grey triggerfish</b>  | <b>Subtropical</b> | <b>Invertivore</b>   | <b>Demersal</b> | <b>9</b>   | <b>51</b>  | <b>60</b>  |
| Batrachoididae    | <i>Opsanus</i>         | <i>tau</i>              | Oyster toadfish          | Subtropical        | Benthic<br>Carnivore | Demersal        | 17         | 31         | 48         |
| Belonidae         | <i>Ablennes</i>        | <i>hians</i>            | Flat needlefish          | Subtropical        | Piscivore            | Demersal        | 0          | 3          | 3          |
| Blenniidae        | <i>Parablennius</i>    | <i>marmoreus</i>        | Seaweed blenny           | Subtropical        | Planktivore          | Demersal        | 177        | 271        | 448        |
| Blenniidae        | <i>Blenniidae</i>      | sp.                     | Unknown blenny           | Tropical           | Omnivore             | Demersal        | 88         | 22         | 110        |
| Blenniidae        | <i>Hypleurochilus</i>  | <i>geminatus</i>        | Crested blenny           | Subtropical        | Omnivore             | Demersal        | 18         | 0          | 18         |
| Blenniidae        | <i>Ophioblennius</i>   | <i>macclurei</i>        | Redlip blenny            | Tropical           | Omnivore             | Demersal        | 0          | 1          | 1          |
| Carangidae        | <i>Decapterus</i>      | <i>macarellus</i>       | Mackerel scad            | Subtropical        | Planktivore          | Pelagic         | 36866      | 19636      | 56502      |
| Carangidae        | <i>Decapterus</i>      | <i>punctatus</i>        | Round scad               | Subtropical        | Planktivore          | Pelagic         | 24256      | 5883       | 30139      |
| Carangidae        | <i>Selar</i>           | <i>crumenophthalmus</i> | Bigeye scad              | Subtropical        | Carnivore            | Pelagic         | 9260       | 52         | 9312       |
| Carangidae        | <i>Decapterus</i>      | sp.                     | Scad species             | Subtropical        | Planktivore          | Pelagic         | 1100       | 0          | 1100       |
| <b>Carangidae</b> | <b><i>Seriola</i></b>  | <b><i>dumerili</i></b>  | <b>Greater amberjack</b> | <b>Subtropical</b> | <b>Piscivore</b>     | <b>Pelagic</b>  | <b>640</b> | <b>114</b> | <b>754</b> |
| Carangidae        | <i>Caranx</i>          | <i>crysos</i>           | Blue runner              | Subtropical        | Benthic<br>Carnivore | Pelagic         | 32         | 225        | 257        |
| Carangidae        | <i>Carangoides</i>     | <i>bartholomaei</i>     | Yellow jack              | Subtropical        | Piscivore            | Pelagic         | 165        | 72         | 237        |
| <b>Carangidae</b> | <b><i>Seriola</i></b>  | <b><i>rivoliana</i></b> | <b>Almaco jack</b>       | <b>Subtropical</b> | <b>Piscivore</b>     | <b>Pelagic</b>  | <b>84</b>  | <b>13</b>  | <b>97</b>  |

|                         |                              |                            |                           |                    |                      |                 |              |              |               |
|-------------------------|------------------------------|----------------------------|---------------------------|--------------------|----------------------|-----------------|--------------|--------------|---------------|
| <b>Carangidae</b>       | <b><i>Caranx</i></b>         | <b><i>ruber</i></b>        | <b>Bar jack</b>           | <b>Subtropical</b> | <b>Omnivore</b>      | <b>Pelagic</b>  | <b>55</b>    | <b>7</b>     | <b>62</b>     |
| Carcharhinidae          | <i>Carcharhinus</i>          | <i>plumbeus</i>            | Sandbar shark             | Subtropical        | Carnivore            | Shark           | 1            | 0            | 1             |
| Chaetodontidae          | <i>Chaetodon</i>             | <i>ocellatus</i>           | Spotfin butterflyfish     | Tropical           | Omnivore             | Demersal        | 8            | 15           | 23            |
| Chaetodontidae          | <i>Chaetodon</i>             | <i>sedentarius</i>         | Reef butterflyfish        | Subtropical        | Omnivore             | Demersal        | 3            | 7            | 10            |
| Cheloniidae             | <i>Caretta</i>               | <i>caretta</i>             | Loggerhead turtle         | Subtropical        | Herbivore            | Turtle          | 0            | 1            | 1             |
| Cheloniidae             | <i>Cheloniidae</i>           | sp.                        | Unknown turtle            | Subtropical        | Herbivore            | Turtle          | 0            | 1            | 1             |
| Dasyatidae              | <i>Dasyatis</i>              | <i>americana</i>           | Southern stingray         | Subtropical        | Benthic<br>Carnivore | Demersal        | 8            | 0            | 8             |
| Diodontidae             | <i>Chilomycterus</i>         | <i>schoepfi</i>            | Striped burrfish          | Tropical           | Invertivore          | Demersal        | 3            | 3            | 6             |
| Diodontidae             | <i>Chilomycterus</i>         | <i>antennatus</i>          | Bridled burrfish          | Tropical           | Invertivore          | Demersal        | 2            | 0            | 2             |
| Echeneidae              | <i>Remora</i>                | <i>remora</i>              | Remora                    | Subtropical        | Carnivore            | Demersal        | 5            | 3            | 8             |
| <b>Ephippidae</b>       | <b><i>Chaetodipterus</i></b> | <b><i>faber</i></b>        | <b>Atlantic spadefish</b> | <b>Subtropical</b> | <b>Invertivore</b>   | <b>Pelagic</b>  | <b>494</b>   | <b>248</b>   | <b>742</b>    |
| Gobiidae                | <i>Coryphopterus</i>         | <i>eidolon</i>             | Pallid goby               | Tropical           | Herbivore            | Demersal        | 25           | 47           | 72            |
| Gobiidae                | <i>Coryphopterus</i>         | <i>glaucofraenum</i>       | Bridled goby              | Tropical           | Omnivore             | Demersal        | 25           | 34           | 59            |
| Gobiidae                | <i>Gobiidae</i>              | sp.                        | Unknown goby              | Tropical           | Omnivore             | Demersal        | 26           | 24           | 50            |
| Gobiidae                | <i>Gnatholepis</i>           | <i>thompsoni</i>           | Goldspot goby             | Tropical           | Omnivore             | Demersal        | 0            | 2            | 2             |
| Grammatidae             | <i>Gramma</i>                | <i>loreto</i>              | Fairy basslet             | Tropical           | Invertivore          | Demersal        | 0            | 2            | 2             |
| Ginglymostom-<br>atidae | <i>Ginglymostoma</i>         | <i>cirratum</i>            | Nurse shark               | Subtropical        | Benthic<br>Carnivore | Shark           | 1            | 0            | 1             |
| <b>Haemulidae</b>       | <b><i>Haemulon</i></b>       | <b><i>aurolineatum</i></b> | <b>Tomtate</b>            | <b>Subtropical</b> | <b>Invertivore</b>   | <b>Pelagic</b>  | <b>92563</b> | <b>25676</b> | <b>118239</b> |
| Haemulidae              | <i>Haemulidae</i>            | sp.                        | Unknown juvenile grunt    | Tropical           | Invertivore          | Demersal        | 23308        | 14461        | 37769         |
| Haemulidae              | <i>Orthopristis</i>          | <i>chrysoptera</i>         | Pigfish                   | Temperate          | Invertivore          | Demersal        | 137          | 1312         | 1449          |
| <b>Haemulidae</b>       | <b><i>Haemulon</i></b>       | <b><i>plumieri</i></b>     | <b>White grunt</b>        | <b>Subtropical</b> | <b>Invertivore</b>   | <b>Demersal</b> | <b>124</b>   | <b>464</b>   | <b>588</b>    |
| Haemulidae              | <i>Anisotremus</i>           | <i>surinamensis</i>        | Black margate             | Subtropical        | Invertivore          | Demersal        | 19           | 9            | 28            |
| <b>Haemulidae</b>       | <b><i>Haemulon</i></b>       | <b><i>album</i></b>        | <b>White margate</b>      | <b>Tropical</b>    | <b>Invertivore</b>   | <b>Demersal</b> | <b>0</b>     | <b>1</b>     | <b>1</b>      |
| Kyphosidae              | <i>Kyphosus</i>              | <i>sectatrix</i>           | Bermuda chub              | Subtropical        | Omnivore             | Demersal        | 1            | 2            | 3             |
| Labridae                | <i>Halichoeres</i>           | <i>bivittatus</i>          | Slippery dick             | Tropical           | Invertivore          | Demersal        | 683          | 2005         | 2688          |
| Labridae                | <i>Halichoeres</i>           | <i>caudalis</i>            | Painted wrasse            | Subtropical        | Invertivore          | Demersal        | 18           | 151          | 169           |
| Labridae                | <i>Tautoga</i>               | <i>onitis</i>              | Tautog                    | Temperate          | Benthic<br>Carnivore | Demersal        | 26           | 70           | 96            |
| Labridae                | <i>Thalassoma</i>            | <i>bifasciatum</i>         | Bluehead wrasse           | Tropical           | Planktivore          | Demersal        | 39           | 15           | 54            |

|                   |                            |                           |                           |                    |                              |                 |              |            |              |
|-------------------|----------------------------|---------------------------|---------------------------|--------------------|------------------------------|-----------------|--------------|------------|--------------|
| Labridae          | <i>Bodianus</i>            | <i>rufus</i>              | Spanish hogfish           | Tropical           | Invertivore                  | Demersal        | 23           | 4          | 27           |
| Labridae          | <i>Halichoeres</i>         | <i>radiatus</i>           | Puddingwife               | Tropical           | Invertivore                  | Demersal        | 11           | 10         | 21           |
| Labridae          | <i>Labridae</i>            | sp.                       | Unknown wrasse            | Tropical           | Invertivore                  | Demersal        | 15           | 0          | 15           |
| <b>Labridae</b>   | <b><i>Lachnolaimus</i></b> | <b><i>maximus</i></b>     | <b>Hogfish</b>            | <b>Subtropical</b> | <b>Invertivore</b>           | <b>Demersal</b> | <b>5</b>     | <b>0</b>   | <b>5</b>     |
| Lotidae           | <i>Brosme</i>              | <i>brosme</i>             | Cusk                      | Temperate          | Invertivore                  | Demersal        | 1            | 0          | 1            |
| <b>Lutjanidae</b> | <b><i>Rhomboplites</i></b> | <b><i>aurorubens</i></b>  | <b>Vermilion snapper</b>  | <b>Subtropical</b> | <b>Benthic<br/>Carnivore</b> | <b>Demersal</b> | <b>18571</b> | <b>193</b> | <b>18764</b> |
| <b>Lutjanidae</b> | <b><i>Lutjanus</i></b>     | <b><i>campechanus</i></b> | <b>Red snapper</b>        | <b>Subtropical</b> | <b>Benthic<br/>Carnivore</b> | <b>Demersal</b> | <b>8</b>     | <b>22</b>  | <b>30</b>    |
| <b>Lutjanidae</b> | <b><i>Lutjanus</i></b>     | <b><i>mahogoni</i></b>    | <b>Mahogany snapper</b>   | <b>Subtropical</b> | <b>Benthic<br/>Carnivore</b> | <b>Demersal</b> | <b>9</b>     | <b>17</b>  | <b>26</b>    |
| <b>Lutjanidae</b> | <b><i>Lutjanus</i></b>     | <b><i>synagris</i></b>    | <b>Lane snapper</b>       | <b>Subtropical</b> | <b>Benthic<br/>Carnivore</b> | <b>Demersal</b> | <b>4</b>     | <b>2</b>   | <b>6</b>     |
| <b>Lutjanidae</b> | <b><i>Lutjanus</i></b>     | <b><i>griseus</i></b>     | <b>Gray snapper</b>       | <b>Subtropical</b> | <b>Benthic<br/>Carnivore</b> | <b>Demersal</b> | <b>5</b>     | <b>0</b>   | <b>5</b>     |
| <b>Lutjanidae</b> | <b><i>Ocyurus</i></b>      | <b><i>chrysurus</i></b>   | <b>Yellowtail snapper</b> | <b>Subtropical</b> | <b>Invertivore</b>           | <b>Demersal</b> | <b>0</b>     | <b>1</b>   | <b>1</b>     |
| Monacanthidae     | <i>Stephanolepis</i>       | <i>hispidus</i>           | Planehead filefish        | Subtropical        | Benthic<br>Carnivore         | Demersal        | 28           | 24         | 52           |
| Mullidae          | <i>Mullus</i>              | <i>auratus</i>            | Red goatfish              | Subtropical        | Benthic<br>Carnivore         | Demersal        | 105          | 2          | 107          |
| Mullidae          | <i>Pseudupeneus</i>        | <i>maculatus</i>          | Spotted goatfish          | Subtropical        | Benthic<br>Carnivore         | Demersal        | 7            | 45         | 52           |
| Mullidae          | <i>Upeneus</i>             | <i>parvus</i>             | Dwarf goatfish            | Tropical           | Benthic<br>Carnivore         | Demersal        | 34           | 8          | 42           |
| Mullidae          | <i>Mulloidichthys</i>      | <i>martinicus</i>         | Yellow goatfish           | Subtropical        | Benthic<br>Carnivore         | Demersal        | 30           | 7          | 37           |
| Muraenidae        | <i>Muraena</i>             | <i>retifera</i>           | Reticulate moray          | Subtropical        | Benthic<br>Carnivore         | Demersal        | 2            | 10         | 12           |
| Muraenidae        | <i>Gymnothorax</i>         | <i>miliaris</i>           | Goldentail moray          | Subtropical        | Benthic<br>Carnivore         | Demersal        | 1            | 3          | 4            |
| Muraenidae        | <i>Muraenidae</i>          | sp.                       | Unknown moray eel         | Subtropical        | Piscivore                    | Demersal        | 0            | 1          | 1            |
| Odontaspidae      | <i>Carcharias</i>          | <i>taurus</i>             | Sand tiger shark          | Subtropical        | Piscivore                    | Pelagic         | 48           | 1          | 49           |
| Ophichthidae      | <i>Myrichthys</i>          | <i>ocellatus</i>          | Goldspotted eel           | Tropical           | Benthic<br>Carnivore         | Demersal        | 2            | 0          | 2            |
| Osteichthyes      | <i>Osteichthyes</i>        | sp.                       | Unknown fish species      | Subtropical        | Omnivore                     | Demersal        | 3            | 12         | 15           |
| Ostraciidae       | <i>Acanthostracion</i>     | <i>polygonius</i>         | Honeycomb cowfish         | Tropical           | Invertivore                  | Demersal        | 0            | 1          | 1            |
| Ostraciidae       | <i>Acanthostracion</i>     | <i>quadricornis</i>       | Scrawled cowfish          | Subtropical        | Invertivore                  | Demersal        | 1            | 0          | 1            |
| Ostraciidae       | <i>Lactophrys</i>          | <i>triqueter</i>          | Smooth trunkfish          | Subtropical        | Invertivore                  | Demersal        | 1            | 0          | 1            |
| Paralichthyidae   | <i>Paralichthys</i>        | <i>albigutta</i>          | Gulf flounder             | Subtropical        | Benthic<br>Carnivore         | Demersal        | 11           | 25         | 36           |
| Paralichthyidae   | <i>Paralichthys</i>        | <i>dentatus</i>           | Summer flounder           | Temperate          | Benthic<br>Carnivore         | Demersal        | 13           | 8          | 21           |
| Paralichthyidae   | <i>Paralichthys</i>        | <i>lethostigma</i>        | Southern flounder         | Subtropical        | Benthic<br>Carnivore         | Demersal        | 4            | 1          | 5            |



|                   |                             |                       |                             |                  |                              |                 |            |             |             |
|-------------------|-----------------------------|-----------------------|-----------------------------|------------------|------------------------------|-----------------|------------|-------------|-------------|
| Phycidae          | <i>Urophycis</i>            | <i>earllii</i>        | Carolina hake               | Subtropical      | Benthic<br>Carnivore         | Demersal        | 5          | 17          | 22          |
| Pomacanthidae     | <i>Holacanthus</i>          | <i>bermudensis</i>    | Blue angelfish              | Subtropical      | Invertivore                  | Demersal        | 65         | 66          | 131         |
| Pomacanthidae     | <i>Holacanthus</i>          | <i>ciliaris</i>       | Queen angelfish             | Subtropical      | Invertivore                  | Demersal        | 5          | 4           | 9           |
| Pomacanthidae     | <i>Pomacanthidae</i>        | sp.                   | Unknown juvenile angelfish  | Subtropical      | Invertivore                  | Demersal        | 0          | 3           | 3           |
| Pomacentridae     | <i>Chromis</i>              | <i>scotti</i>         | Purple reeffish             | Tropical         | Planktivore                  | Demersal        | 962        | 60          | 1022        |
| Pomacentridae     | <i>Pomacentridae</i>        | sp.                   | Unknown juvenile damselfish | Tropical         | Herbivore                    | Demersal        | 26         | 85          | 111         |
| Pomacentridae     | <i>Stegastes</i>            | <i>leucostictus</i>   | Beaugregory damselfish      | Tropical         | Omnivore                     | Demersal        | 78         | 26          | 104         |
| Pomacentridae     | <i>Stegastes</i>            | <i>variabilis</i>     | Cocoa damselfish            | Tropical         | Herbivore                    | Demersal        | 13         | 69          | 82          |
| Pomacentridae     | <i>Stegastes</i>            | <i>partitus</i>       | Bicolor damselfish          | Tropical         | Herbivore                    | Demersal        | 29         | 42          | 71          |
| Pomacentridae     | <i>Chromis</i>              | <i>cyanea</i>         | Blue chromis                | Tropical         | Planktivore                  | Demersal        | 23         | 0           | 23          |
| Pomacentridae     | <i>Stegastes</i>            | <i>diencaeus</i>      | Longfin damselfish          | Tropical         | Omnivore                     | Demersal        | 9          | 0           | 9           |
| Pomacentridae     | <i>Stegastes</i>            | <i>adustus</i>        | Dusky damselfish            | Tropical         | Herbivore                    | Demersal        | 3          | 0           | 3           |
| Pomacentridae     | <i>Abudefduf</i>            | <i>saxatilis</i>      | Sergeant-major              | Tropical         | Omnivore                     | Demersal        | 1          | 1           | 2           |
| Pomacentridae     | <i>Chromis</i>              | <i>enchrysur</i>      | Yellowtail reeffish         | Tropical         | Planktivore                  | Demersal        | 0          | 2           | 2           |
| Pomacentridae     | <i>Abudefduf</i>            | <i>taurus</i>         | Night sergeant              | Subtropical      | Omnivore                     | Demersal        | 0          | 1           | 1           |
| Ptereleotridae    | <i>Ptereleotris</i>         | <i>calliura</i>       | Blue dartfish               | Tropical         | Planktivore                  | Demersal        | 0          | 27          | 27          |
| Rachycentridae    | <i>Rachycentron</i>         | <i>canadum</i>        | Cobia                       | Subtropical      | Carnivore                    | Pelagic         | 1          | 0           | 1           |
| Rajidae           | <i>Dipturus</i>             | <i>laevis</i>         | Barndoor skate              | Temperate        | Carnivore                    | Demersal        | 0          | 1           | 1           |
| Scaridae          | <i>Sparisoma</i>            | <i>atomarium</i>      | Greenblotch parrotfish      | Tropical         | Herbivore                    | Demersal        | 2          | 7           | 9           |
| Scaridae          | <i>Scarus</i>               | <i>iseri</i>          | Striped parrotfish          | Subtropical      | Herbivore                    | Demersal        | 0          | 3           | 3           |
| Sciaenidae        | <i>Pareques</i>             | <i>umbrosus</i>       | Cubbyu                      | Subtropical      | Benthic<br>Carnivore         | Demersal        | 617        | 669         | 1286        |
| Sciaenidae        | <i>Pareques</i>             | <i>acuminatus</i>     | High-hat                    | Tropical         | Benthic<br>Carnivore         | Demersal        | 3          | 3           | 6           |
| Scombridae        | <i>Scomberomorus</i>        | <i>maculatus</i>      | Spanish mackerel            | Subtropical      | Piscivore                    | Pelagic         | 592        | 2           | 594         |
| Scombridae        | <i>Scomberomorus</i>        | <i>cavalla</i>        | King mackerel               | Tropical         | Piscivore                    | Pelagic         | 250        | 0           | 250         |
| Scombridae        | <i>Euthynnus</i>            | <i>alletteratus</i>   | Little tunny                | Tropical         | Piscivore                    | Pelagic         | 146        | 8           | 154         |
| Scorpaenidae      | <i>Pterois</i>              | <i>volitans</i>       | Lionfish                    | Tropical         | Piscivore                    | Demersal        | 35         | 12          | 47          |
| Scorpaenidae      | <i>Scorpaena</i>            | <i>plumieri</i>       | Spotted scorpionfish        | Subtropical      | Benthic<br>Carnivore         | Demersal        | 1          | 2           | 3           |
| <b>Serranidae</b> | <b><i>Centropristis</i></b> | <b><i>striata</i></b> | <b>Black sea bass</b>       | <b>Temperate</b> | <b>Benthic<br/>Carnivore</b> | <b>Demersal</b> | <b>919</b> | <b>2116</b> | <b>3035</b> |

|                   |                             |                              |                            |                    |                          |                 |            |            |             |
|-------------------|-----------------------------|------------------------------|----------------------------|--------------------|--------------------------|-----------------|------------|------------|-------------|
| Serranidae        | <i>Serranus</i>             | <i>subligarius</i>           | Belted sandfish            | Subtropical        | Invertivore              | Demersal        | 494        | 703        | 1197        |
| <b>Serranidae</b> | <b><i>Mycteroperca</i></b>  | <b><i>microlepis</i></b>     | <b>Gag</b>                 | <b>Subtropical</b> | <b>Benthic Carnivore</b> | <b>Demersal</b> | <b>190</b> | <b>185</b> | <b>375</b>  |
| <b>Serranidae</b> | <b><i>Centropristis</i></b> | <b><i>ocyurus</i></b>        | <b>Bank sea bass</b>       | <b>Subtropical</b> | <b>Benthic Carnivore</b> | <b>Demersal</b> | <b>45</b>  | <b>197</b> | <b>242</b>  |
| <b>Serranidae</b> | <b><i>Mycteroperca</i></b>  | <b><i>phenax</i></b>         | <b>Scamp</b>               | <b>Subtropical</b> | <b>Piscivore</b>         | <b>Demersal</b> | <b>91</b>  | <b>106</b> | <b>197</b>  |
| Serranidae        | <i>Rypticus</i>             | <i>maculatus</i>             | White spotted soapfish     | Subtropical        | Benthic Carnivore        | Demersal        | 60         | 55         | 115         |
| Serranidae        | <i>Diplectrum</i>           | <i>formosum</i>              | Sand perch                 | Subtropical        | Benthic Carnivore        | Demersal        | 5          | 34         | 39          |
| <b>Serranidae</b> | <b><i>Epinephelus</i></b>   | <b><i>guttatus</i></b>       | <b>Red hind</b>            | <b>Tropical</b>    | <b>Invertivore</b>       | <b>Demersal</b> | <b>2</b>   | <b>0</b>   | <b>2</b>    |
| Serranidae        | <i>Hypoplectrus</i>         | <i>puella</i>                | Barred hamlet              | Tropical           | Invertivore              | Demersal        | 0          | 2          | 2           |
| Serranidae        | <i>Serranus</i>             | <i>baldwini</i>              | Lantern bass               | Tropical           | Benthic Carnivore        | Demersal        | 0          | 2          | 2           |
| Serranidae        | <i>Serranus</i>             | <i>phoebe</i>                | Tattler bass               | Subtropical        | Invertivore              | Demersal        | 0          | 2          | 2           |
| Serranidae        | <i>Serranus</i>             | <i>tigrinus</i>              | Harlequin bass             | Tropical           | Invertivore              | Demersal        | 0          | 2          | 2           |
| Serranidae        | <i>Liopropoma</i>           | <i>eukrines</i>              | Wrasse bass                | Subtropical        | Benthic Carnivore        | Demersal        | 0          | 1          | 1           |
| <b>Serranidae</b> | <b><i>Mycteroperca</i></b>  | <b><i>interstitialis</i></b> | <b>Yellowmouth grouper</b> | <b>Subtropical</b> | <b>Piscivore</b>         | <b>Demersal</b> | <b>1</b>   | <b>0</b>   | <b>1</b>    |
| Serranidae        | <i>Rypticus</i>             | <i>saponaceus</i>            | Greater soapfish           | Tropical           | Benthic Carnivore        | Demersal        | 1          | 0          | 1           |
| Sparidae          | <i>Diplodus</i>             | <i>holbrookii</i>            | Spottail pinfish           | Subtropical        | Omnivore                 | Demersal        | 10053      | 6513       | 16566       |
| <b>Sparidae</b>   | <b><i>Stenotomus</i></b>    | <b><i>chrysops</i></b>       | <b>Scup</b>                | <b>Subtropical</b> | <b>Benthic Carnivore</b> | <b>Demersal</b> | <b>533</b> | <b>474</b> | <b>1007</b> |
| Sparidae          | <i>Archosargus</i>          | <i>probratocephalus</i>      | Sheepshead                 | Subtropical        | Omnivore                 | Demersal        | 372        | 135        | 507         |
| Sparidae          | <i>Lagodon</i>              | <i>rhomboides</i>            | Pinfish                    | Subtropical        | Omnivore                 | Demersal        | 192        | 83         | 275         |
| Sparidae          | <i>Calamus</i>              | <i>penna</i>                 | Sheepshead porgy           | Tropical           | Invertivore              | Demersal        | 76         | 161        | 237         |
| <b>Sparidae</b>   | <b><i>Stenotomus</i></b>    | <b><i>caprinus</i></b>       | <b>Longspine porgy</b>     | <b>Subtropical</b> | <b>Benthic Carnivore</b> | <b>Demersal</b> | <b>56</b>  | <b>171</b> | <b>227</b>  |
| Sparidae          | <i>Calamus</i>              | <i>proridens</i>             | Littlehead porgy           | Subtropical        | Invertivore              | Demersal        | 2          | 122        | 124         |
| <b>Sparidae</b>   | <b><i>Calamus</i></b>       | <b><i>calamus</i></b>        | <b>Saucereye porgy</b>     | <b>Subtropical</b> | <b>Invertivore</b>       | <b>Demersal</b> | <b>46</b>  | <b>67</b>  | <b>113</b>  |
| <b>Sparidae</b>   | <b><i>Calamus</i></b>       | <b><i>nodosus</i></b>        | <b>Knobbed porgy</b>       | <b>Subtropical</b> | <b>Invertivore</b>       | <b>Demersal</b> | <b>2</b>   | <b>26</b>  | <b>28</b>   |
| <b>Sparidae</b>   | <b><i>Calamus</i></b>       | <b><i>bajonado</i></b>       | <b>Jolthead porgy</b>      | <b>Subtropical</b> | <b>Invertivore</b>       | <b>Demersal</b> | <b>5</b>   | <b>10</b>  | <b>15</b>   |
| <b>Sparidae</b>   | <b><i>Sparidae</i></b>      | <b>sp.</b>                   | <b>Unknown porgy</b>       | <b>Tropical</b>    | <b>Invertivore</b>       | <b>Demersal</b> | <b>74</b>  | <b>6</b>   | <b>80</b>   |
| Sparidae          | <i>Archosargus</i>          | <i>rhomboidalis</i>          | Sea bream                  | Subtropical        | Omnivore                 | Demersal        | 4          | 0          | 4           |
| <b>Sparidae</b>   | <b><i>Pagrus</i></b>        | <b><i>pagrus</i></b>         | <b>Red porgy</b>           | <b>Subtropical</b> | <b>Invertivore</b>       | <b>Demersal</b> | <b>3</b>   | <b>0</b>   | <b>3</b>    |
| Sphyraenidae      | <i>Sphyraena</i>            | <i>guachancho</i>            | Guaguanche                 | Subtropical        | Piscivore                | Pelagic         | 590        | 200        | 790         |

|                |                     |                  |                    |             |                      |          |    |    |    |
|----------------|---------------------|------------------|--------------------|-------------|----------------------|----------|----|----|----|
| Sphyraenidae   | <i>Sphyraena</i>    | <i>barracuda</i> | Barracuda          | Subtropical | Piscivore            | Pelagic  | 73 | 7  | 80 |
| Sphyraenidae   | <i>Sphyraena</i>    | <i>borealis</i>  | Northern sennet    | Subtropical | Piscivore            | Pelagic  | 0  | 1  | 1  |
| Synodontidae   | <i>Synodus</i>      | <i>foetens</i>   | Inshore lizardfish | Tropical    | Piscivore            | Demersal | 1  | 3  | 4  |
| Tetraodontidae | <i>Canthigaster</i> | <i>rostrata</i>  | Sharpnose puffer   | Tropical    | Omnivore             | Demersal | 33 | 23 | 56 |
| Tetraodontidae | <i>Sphoeroides</i>  | <i>spengleri</i> | Bandtail puffer    | Subtropical | Benthic<br>Carnivore | Demersal | 10 | 11 | 21 |

37

38 **Supplementary Table 3:** Generalized linear model (GLM) results for fish abundance and  
 39 biomass by fish climate range (tropical, subtropical, temperate). Environmental variables include  
 40 reef type (artificial versus natural, average reef depth (m), reef complexity (m), squared reef  
 41 complexity (m), and water temperature (°C). Bold values indicate significance. Model results  
 42 displayed here are from the best models that we evaluated. GLMs used negative-binomial  
 43 distributions.

| <b>Fish climate range</b> | <b>Metric</b> | <b>Predictor variable</b> | <b>df</b> | <b>Deviance</b> | <b>Residual df</b> | <b>Residual deviance</b> | <b>P</b>          |
|---------------------------|---------------|---------------------------|-----------|-----------------|--------------------|--------------------------|-------------------|
| Tropical                  | Abundance     | Null                      |           |                 | 123                | 203.0                    |                   |
|                           |               | <b>Reef type</b>          | 1         | 4.3             | 122                | 198.7                    | <b>0.04</b>       |
|                           |               | <b>Depth</b>              | 1         | 35.6            | 121                | 163.2                    | <b>&lt;0.0001</b> |
|                           |               | <b>Reef type X Depth</b>  | 1         | 5.7             | 120                | 157.5                    | <b>0.02</b>       |
| Subtropical               | Abundance     | Null                      |           |                 | 123                | 241.8                    |                   |
|                           |               | <b>Reef type</b>          | 1         | 41.9            | 122                | 199.9                    | <b>&lt;0.0001</b> |
|                           |               | <b>Depth</b>              | 1         | 42.1            | 121                | 157.7                    | <b>&lt;0.0001</b> |
|                           |               | <b>Complexity</b>         | 1         | 5.1             | 120                | 152.6                    | <b>0.02</b>       |
|                           |               | <b>Complexity^2</b>       | 1         | 8.7             | 119                | 143.9                    | <b>&lt;0.01</b>   |
| Temperate                 | Abundance     | Null                      |           |                 | 123                | 204.2                    |                   |
|                           |               | <b>Reef type</b>          | 1         | 36.7            | 122                | 167.4                    | <b>&lt;0.0001</b> |
|                           |               | Depth                     | 1         | 3.1             | 121                | 164.4                    | 0.08              |
|                           |               | <b>Temperature</b>        | 1         | 29.1            | 120                | 135.3                    | <b>&lt;0.0001</b> |
| Tropical                  | Biomass       | Null                      |           |                 | 123                | 92.3                     |                   |
|                           |               | <b>Reef type</b>          | 1         | 12.3            | 122                | 80.0                     | <b>&lt;0.001</b>  |
|                           |               | <b>Depth</b>              | 1         | 6.9             | 121                | 73.1                     | <b>&lt;0.01</b>   |
| Subtropical               | Biomass       | Null                      |           |                 | 123                | 283.6                    |                   |
|                           |               | <b>Reef type</b>          | 1         | 85.5            | 122                | 198.1                    | <b>&lt;0.0001</b> |
|                           |               | <b>Depth</b>              | 1         | 32.7            | 121                | 165.5                    | <b>&lt;0.0001</b> |
|                           |               | <b>Reef type X Depth</b>  | 1         | 20.1            | 120                | 145.4                    | <b>&lt;0.0001</b> |
| Temperate                 | Biomass       | Null                      |           |                 | 123                | 146.1                    |                   |
|                           |               | <b>Reef type</b>          | 1         | 12.9            | 122                | 132.6                    | <b>&lt;0.001</b>  |
|                           |               | <b>Temperature</b>        | 1         | 6.4             | 121                | 126.1                    | <b>0.01</b>       |

44

45 **Supplementary Table 4:** Generalized linear model (GLM) results for fish abundance by  
 46 functional group on deep (18-25 m) reefs. Environmental variables include reef type (artificial  
 47 versus natural). Bold values indicate significance with significance. Model results displayed here  
 48 are from the best models that we evaluated. GLMs used negative-binomial distributions.

49

| <b>Fish functional group</b> | <b>Fish climate range</b> | <b>Predictor variable</b> | <b>df</b> | <b>Deviance</b> | <b>Residual df</b> | <b>Residual deviance</b> | <b>P</b>          |
|------------------------------|---------------------------|---------------------------|-----------|-----------------|--------------------|--------------------------|-------------------|
| Planktivores                 | All                       | Null                      |           |                 | 39                 | 58.3                     |                   |
|                              |                           | <b>Reef type</b>          | 1         | 8.3             | 38                 | 50.0                     | <b>&lt;0.001</b>  |
| Planktivores                 | Tropical                  | Null                      |           |                 | 39                 | 33.2                     |                   |
|                              |                           | <b>Reef type</b>          | 1         | 7.1             | 38                 | 26.1                     | <b>&lt;0.01</b>   |
| Piscivores                   | All                       | Null                      |           |                 | 39                 | 93.6                     |                   |
|                              |                           | <b>Reef type</b>          | 1         | 51.3            | 38                 | 42.3                     | <b>&lt;0.0001</b> |
| Piscivores                   | Tropical                  | Null                      |           |                 | 39                 | 38.5                     |                   |
|                              |                           | <b>Reef type</b>          | 1         | 13.4            | 38                 | 25.1                     | <b>&lt;0.001</b>  |
| Herbivores                   | All                       | Null                      |           |                 | 39                 | 42.7                     |                   |
|                              |                           | Reef type                 | 1         | 0.6             | 38                 | 42.1                     | 0.4               |
| Herbivores                   | Tropical                  | Null                      |           |                 | 39                 | 39.4                     |                   |
|                              |                           | Reef type                 | 1         | 0.3             | 38                 | 39.1                     | 0.6               |
| Omnivores                    | All                       | Null                      |           |                 | 39                 | 63.0                     |                   |
|                              |                           | <b>Reef type</b>          | 1         | 15.3            | 38                 | 47.7                     | <b>&lt;0.0001</b> |
| Omnivores                    | Tropical                  | Null                      |           |                 | 39                 | 46.3                     |                   |
|                              |                           | <b>Reef type</b>          | 1         | 6.1             | 38                 | 40.2                     | <b>0.01</b>       |
| Invertivores                 | All                       | Null                      |           |                 | 39                 | 65.8                     |                   |
|                              |                           | <b>Reef type</b>          | 1         | 18.4            | 38                 | 47.4                     | <b>&lt;0.0001</b> |
| Invertivores                 | Tropical                  | Null                      |           |                 | 39                 | 63.5                     |                   |
|                              |                           | <b>Reef type</b>          | 1         | 10.8            | 38                 | 52.8                     | <b>&lt;0.01</b>   |
| Carnivores                   | All                       | Null                      |           |                 | 39                 | 112.9                    |                   |
|                              |                           | <b>Reef type</b>          | 1         | 67.5            | 38                 | 45.3                     | <b>&lt;0.0001</b> |
| Carnivores                   | Tropical                  | Null                      |           |                 | 39                 | 11.0                     |                   |
|                              |                           | Reef type                 | 1         | 0.9             | 38                 | 10.1                     | 0.3               |

50

51 **Supplementary Table 5:** Fishes not commonly reported as far north as surveyed reefs. Each  
52 species includes its scientific name, common name, climate range, and northern latitude (N\_lat;  
53 <sup>1</sup>, as well as mean count  $\pm$  standard error on artificial (Artificial\_Mean; N = 55) and natural  
54 (Natural\_Mean; N = 63). Reef preference indicates whether fishes exclusively occurred on  
55 artificial (AR\_exclusive) or natural (NR\_exclusive) reefs or whether they generally resided on  
56 artificial (AR) or natural (NR) reefs. Prey consumed by each species is provided. Northern  
57 latitudes represent the commonly documented and preferred latitudes from Fishbase <sup>1</sup>. Some may  
58 seem counterintuitive. For example, *Mulloidichthys martinicus* has a northern latitude of 32°N and  
59 is subtropical species while *Thalassoma bifasciatum* has a northern latitude of 32°N but is  
60 classified as tropical. These classifications are based on preferred and commonly documented  
61 ranges, as well as climate ranges assigned in Whitfield et al. 2014 <sup>2</sup>.

| #  | Scientific name                    | Common name         | Climate range | N lat | Artificial (mean $\pm$ se) | Natural (mean $\pm$ se) | Reef preference | Prey                                                      |
|----|------------------------------------|---------------------|---------------|-------|----------------------------|-------------------------|-----------------|-----------------------------------------------------------|
| 1  | <i>Chromis cyanea</i>              | Blue chromis        | Tropical      | 32    | 0.21 $\pm$ 0.20            | 0.00 $\pm$ 0.00         | AR_exclusive    | Planktivore                                               |
| 2  | <i>Myrichthys ocellatus</i>        | Goldspotted eel     | Tropical      | 25    | 0.02 $\pm$ 0.02            | 0.00 $\pm$ 0.00         | AR_exclusive    | Benthic Carnivore                                         |
| 3  | <i>Mycteroperca interstitialis</i> | Yellowmouth grouper | Subtropical   | 33    | 0.01 $\pm$ 0.01            | 0.00 $\pm$ 0.00         | AR_exclusive    | Piscivore                                                 |
| 4  | <i>Thalassoma bifasciatum</i>      | Bluehead wrasse     | Tropical      | 32    | 0.35 $\pm$ 0.24            | 0.12 $\pm$ 0.09         | AR              | Planktivore                                               |
| 5  | <i>Canthigaster rostrata</i>       | Sharpnose puffer    | Tropical      | 30    | 0.30 $\pm$ 0.12            | 0.18 $\pm$ 0.06         | AR              | Omnivore                                                  |
| 6  | <i>Mulloidichthys martinicus</i>   | Yellow goatfish     | Subtropical   | 32    | 0.27 $\pm$ 0.26            | 0.06 $\pm$ 0.06         | AR              | Benthic Carnivore                                         |
| 7  | <i>Bodianus rufus</i>              | Spanish hogfish     | Tropical      | 32    | 0.21 $\pm$ 0.09            | 0.03 $\pm$ 0.02         | AR              | Invertivore; eat parasites from large fish when juveniles |
| 8  | <i>Anisotremus surinamensis</i>    | Black margate       | Subtropical   | 30    | 0.17 $\pm$ 0.12            | 0.07 $\pm$ 0.05         | AR              | Invertivore; also zooplankton and small fish              |
| 9  | <i>Holacanthus ciliaris</i>        | Queen angelfish     | Subtropical   | 32    | 0.05 $\pm$ 0.03            | 0.03 $\pm$ 0.03         | AR              | Invertivore                                               |
| 10 | <i>Pareques acuminatus</i>         | High hat            | Tropical      | 32    | 0.03 $\pm$ 0.02            | 0.02 $\pm$ 0.02         | AR              | Benthic Carnivore                                         |

|    |                             |                         |             |    |             |             |              |                      |
|----|-----------------------------|-------------------------|-------------|----|-------------|-------------|--------------|----------------------|
| 11 | <i>Calamus penna</i>        | Sheepshead porgy        | Tropical    | 30 | 0.69 ± 0.23 | 1.28 ± 0.50 | NR           | Invertivore          |
| 12 | <i>Stegastes variabilis</i> | Cocoa damselfish        | Tropical    | 30 | 0.12 ± 0.05 | 0.55 ± 0.34 | NR           | Herbivore            |
| 13 | <i>Sparisoma atomarium</i>  | Green blotch parrotfish | Tropical    | 32 | 0.02 ± 0.01 | 0.06 ± 0.04 | NR           | Herbivore            |
| 14 | * <i>Abudefduf taurus</i>   | Night sergeant          | Subtropical | 24 | 0.00 ± 0.00 | 0.01 ± 0.01 | NR_exclusive | Omnivore; also algae |
| 15 | <i>Chromis enchrysur</i>    | Yellowtail reefish      | Tropical    | 32 | 0.00 ± 0.00 | 0.02 ± 0.02 | NR_exclusive | Planktivore          |
| 16 | <i>Haemulon album</i>       | White margate           | Tropical    | 33 | 0.00 ± 0.00 | 0.01 ± 0.01 | NR_exclusive | Invertivore          |
| 17 | <i>Serranus baldwini</i>    | Lantern bass            | Tropical    | 25 | 0.00 ± 0.00 | 0.02 ± 0.02 | NR_exclusive | Benthic Carnivore    |
| 18 | <i>Serranus phoebe</i>      | Tattler bass            | Subtropical | 32 | 0.00 ± 0.00 | 0.02 ± 0.02 | NR_exclusive | Invertivore          |
| 19 | <i>Serranus tigrinus</i>    | Harlequin bass          | Tropical    | 32 | 0.00 ± 0.00 | 0.02 ± 0.02 | NR_exclusive | Invertivore          |

62

63

64

65 **Supplementary References**

- 66 1. Froese, R. & Pauly, D. FishBase. (2018). at <[www.fishbase.org](http://www.fishbase.org)>
- 67 2. Whitfield, P. E. *et al.* Native fish community structure and Indo-Pacific lionfish *Pterois*
- 68 *volitans* densities along a depth-temperature gradient in Onslow Bay, North Carolina,
- 69 USA. *Mar. Ecol. Prog. Ser.* **509**, 241–254 (2014).

70
